# Supplementary material for: Effects of aging on the phytochemical profile and antioxidative activity of Pericarpium Citri Reticulatae ‘Chachiensis’
Source: Royal Society of Chemistry journal article supplement (doi:10.1039/c6ra22082g), 2016-01-01
Supplement: c6ra22082g1.pdf [file c6ra22082g1.pdf]

**Supplemental Table 1.** Descriptions of PCR-Chachiensis samples used in this study

| Name  | Sample                                                                              | Moisture (%) <sup>a</sup> | Production year | Aging period in 2013 | Aging period in 2015 |
|-------|-------------------------------------------------------------------------------------|---------------------------|-----------------|----------------------|----------------------|
| FRESH |    | 81.11±1.81 c              | 2013            | /                    | /                    |
| PCR01 |    | 18.69±0.10 b              | 2013            | /                    | 2 years              |
| PCR06 |   | 13.37±0.21 a              | 2008            | 5 years              | 7 years              |
| PCR13 |  | 13.98±0.62 a              | 2001            | 12 years             | 14 years             |

<sup>a</sup> Moisture value (mean ± SD, n=3) with different letters differ significantly at  $p < 0.05$ .

**Supplemental Table 2.** The variable loading for the first two principal components

| variables               | component 1<br>(75.92%) | component 2<br>(15.11%) |
|-------------------------|-------------------------|-------------------------|
| chlorogenic acid        | 0.288                   | -0.276                  |
| caffeic acid            | 0.309                   | -0.160                  |
| <i>p</i> -coumaric acid | 0.273                   | 0.233                   |
| ferulic acid            | 0.069                   | 0.537                   |
| naringin                | 0.285                   | -0.264                  |
| hesperidin              | 0.276                   | 0.263                   |
| neohesperidin           | 0.309                   | -0.078                  |
| naringenin              | 0.312                   | 0.060                   |
| hesperetin              | 0.315                   | -0.049                  |
| nobiletin               | 0.312                   | -0.018                  |
| tangeretin              | 0.312                   | -0.114                  |
| total phenolics         | 0.298                   | 0.127                   |
| total flavonoids        | 0.0904                  | 0.613                   |

A

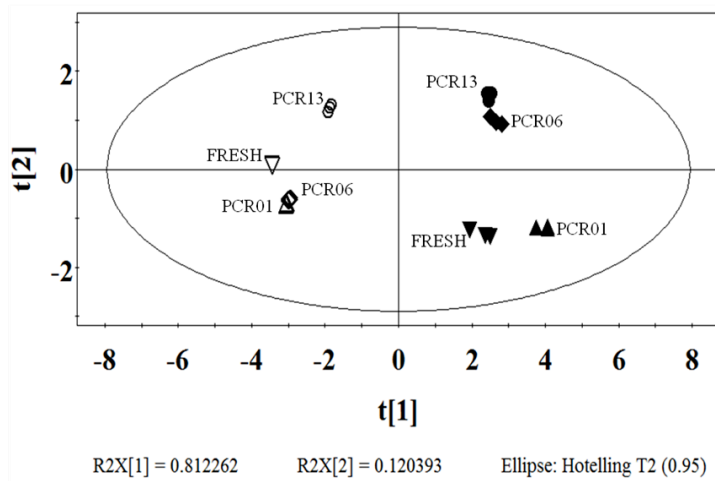

B

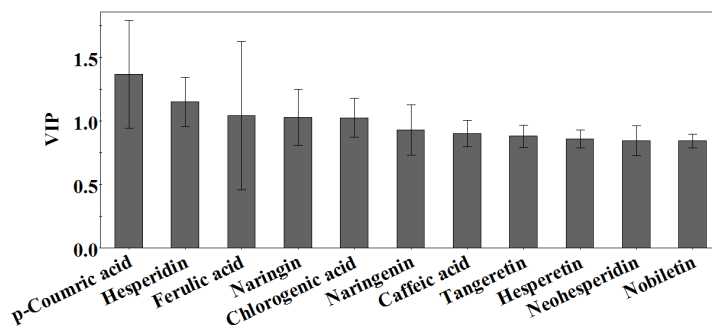

**Supplemental Figure 1.** PLS-DA analysis based on the phenolic compound profiles.

(A) PLS-DA score plots based on the phenolic compound profiles.

(B) Variable importance plot (VIP) through PLS-DA analysis
